# Supplementary material
Source: Research Square preprint supplement (doi:10.21203/rs.3.rs-15226/v4)
Supplement: Supplementary file 1 [file 3744320a90e56932aa39311d.xlsx]

## Sheet: Sheet1
Table 4. Genotype estimated genetic values (GEGV) of tree height, trunk diameter and canopy width and the reported dwarfing ability of Malus rootstock accessions.
Accession	Origin	Genotype	Genotype estimated genetic value			Dwarfing ability
			Tree height(m)	Trunk diameter(cm)	Canopy width(m)
M27	M13×M9	LdLiAdAiGdGi	2.98	3.75	1.68	Hyper-dwarfing
B9	M8×Redstandard	LdLiAdAiGdGi	2.98	3.75	1.68	Dwarfing
O3	Robin Crab×M9	LdLiAdAiGdGi	2.98	3.75	1.68	Dwarfing
Mark	M8 open pollination	LdLiAdAiGdGi	2.98	3.75	1.68	Dwarfing
M9	M. pumila Paradise Jaune de Metz	LdLiAdAiGdGi	2.98	3.75	1.68	Dwarfing
M26	M13×M9	LdLiAdAiGdGi	2.98	3.75	1.68	Dwarfing
B118	Unknown	LdLiAdAiGdGi	2.98	3.75	1.68	Dwarfing
CG10	M8 open pollination	LdLiAdAiGdGi	2.98	3.75	1.68	Dwarfing
CG24	M8 open pollination	LdLiAdAiGdGi	2.98	3.75	1.68	Dwarfing
CG80	M8 open pollination	LdLiAdAiGdGi	2.98	3.75	1.68	Dwarfing
JM7	M. prunifolia×M9	LdLiAdAiGdGi	2.98	3.75	1.68	Dwarfing
Km23	M.asiatica×M9	LdLiAdAiGdGi	2.98	3.75	1.68	Dwarfing
Liaozhen2	Zulienite×M9	LdLiAdAiGdGi	2.98	3.75	1.68	Dwarfing
GM256	M. prunifolia×M9	LiLiAdAiGdGi	3.28	4.06	1.83	Dwarfing
SH6	Ralls Janet × M. honanensis	LiLiAdAiGdGi	3.28	4.06	1.83	Semi-dwarfing
SH38	Ralls Janet × M. honanensis	LiLiAdAiGdGi	3.28	4.06	1.83	Semi-dwarfing
SH40	Ralls Janet × M. honanensis	LiLiAdAiGdGi	3.28	4.06	1.83	Semi-dwarfing
SH48	Ralls Janet × M. honanensis	LiLiAdAiGdGi	3.28	4.06	1.83	Semi-dwarfing
M7	Praecox open pollination	LdLiAdAiGiGi	3.38	4.22	1.87	Semi-dwarfing
MM106	Northern Spy × M1	LdLiAdAiGiGi	3.38	4.22	1.87	Semi-dwarfing
GM310	Hongtaiping × M9	LdLiAdAiGiGi	3.38	4.22	1.87	Semi-dwarfing
CX5	M193 × M9	LdLiAdAiGiGi	3.38	4.22	1.87	Semi-dwarfing
77-34	M9 × M. prunifolia	LiLiAdAiGiGi	3.68	4.53	2.02	Semi-dwarfing
SH29	Ralls Janet × M. honanensis	LiLiAdAiGiGi	3.68	4.53	2.02	Semi-dwarfing
SH9	Ralls Janet × M. honanensis	LiLiAdAiGiGi	3.68	4.53	2.02	Semi-dwarfing
SH18	Ralls Janet × M. honanensis	LiLiAdAiGiGi	3.68	4.53	2.02	Semi-dwarfing
M. turkmenorum	M. turkmenorum	LiLiAdAdGdGi	3.89	4.75	2.09	Vigorous
Gansudaogua	M. halliana	LiLiAdAdGdGi	3.89	4.75	2.09	Vigorous
M. spectabilis	M. spectabilis	LiLiAdAdGdGi	3.89	4.75	2.09	Vigorous
Banayefu		LiLiAdAdGdGi	3.89	4.75	2.09	Vigorous
Laiwuchaguo	M. micromalus	LiLiAdAdGdGi	3.89	4.75	2.09	Vigorous
Laiwunanyan	M. micromalus	LiLiAdAdGdGi	3.89	4.75	2.09	Vigorous
M. manshurica	M. manshurica	LiLiAdAdGdGi	3.89	4.75	2.09	Vigorous
Daguo Crab	M. platycarpa	LiLiAdAdGdGi	3.89	4.75	2.13	Vigorous
M. soulardii	M. soulardii	LdLiAdAdGiGi	3.99	4.91	2.13	Vigorous
M. toringoides	M. toringoides	LdLiAdAdGiGi	3.99	4.91	2.13	Vigorous
Laosannaizi	M. asiatica	LdLiAdAdGiGi	3.99	4.91	2.13	Vigorous
Pingyitiancha	M. hupehensis	LdLiAdAdGiGi	3.99	4.91	2.13	Vigorous
Longwang 1	M. hupehensis	LdLiAdAdGiGi	3.99	4.91	2.13	Vigorous
Daishanbianye	M. toringoides.var.daishanensis	LdLiAdAdGiGi	3.99	4.91	2.13	Vigorous
Yingye Crab		LdLiAdAdGiGi	3.99	4.91	2.13	Vigorous
M. kansuensis	M. kansuensis	LdLiAdAdGiGi	3.99	4.91	2.13	Vigorous
M. coronaria	M. coronaria	LiLiAdAdGiGi	4.29	5.22	2.32	Vigorous
Baleng Crab	M. robusta	LiLiAdAdGiGi	4.29	5.22	2.32	Vigorous
Guanghui Crab		LiLiAdAdGiGi	4.29	5.22	2.32	Vigorous
M. coronaria	M. coronaria	LiLiAdAdGiGi	4.29	5.22	2.32	Vigorous
M. halliana	M. halliana	LiLiAdAdGiGi	4.29	5.22	2.32	Vigorous
M. ombrophila	M. ombrophila	LiLiAdAdGiGi	4.29	5.22	2.32	Vigorous
M. micromalus	M. micromalus	LiLiAdAdGiGi	4.29	5.22	2.32	Vigorous
M. ioensis	M. ioensis	LiLiAdAdGiGi	4.29	5.22	2.32	Vigorous
M. sieversii	M. sieversii	LiLiAdAdGiGi	4.29	5.22	2.32	Vigorous
M. platycarpa	M. platycarpa	LiLiAdAdGiGi	4.29	5.22	2.32	Vigorous
Lushi Crab	M. prattii	LiLiAdAdGiGi	4.29	5.22	2.32	Vigorous
M. sieboldii	M. sieboldii	LiLiAdAdGiGi	4.29	5.22	2.32	Vigorous
Royalty		LiLiAdAdGiGi	4.29	5.22	2.32	Vigorous
Yuanyehaitang	M. prunifolia. var. ringo	LiLiAdAdGiGi	4.29	5.22	2.32	Vigorous
M. sargenti	M. sargenti	LiLiAdAdGiGi	4.29	5.22	2.32	Vigorous
M. sikkihensis	M. sikkihensis	LiLiAdAdGiGi	4.29	5.22	2.32	Vigorous
Xiaohuang Crab		LiLiAdAdGiGi	4.29	5.22	2.32	Vigorous
Niumama Crab	M. robusta	LiLiAdAdGiGi	4.29	5.22	2.32	Vigorous
M. tschonoskii	M. tschonoskii	LiLiAdAdGiGi	4.29	5.22	2.32	Vigorous
Qiuzi	M. prunifolia	LiLiAdAdGiGi	4.29	5.22	2.32	Vigorous
Binzi	M. domestica .var. binzi	LiLiAdAdGiGi	4.29	5.22	2.32	Vigorous
M. baccata	M. baccata	LiLiAdAdGiGi	4.29	5.22	2.32	Vigorous
